# Supplementary material for: The current landscape of pre-exposure prophylaxis service delivery models for HIV prevention: a scoping review
Source: PubMed Central journal article supplement (PMC7395423; doi:10.1186/s12913-020-05568-w), 2020-07-31
Supplement: 12913_2020_5568_MOESM1_ESM.pdf [file 12913_2020_5568_MOESM1_ESM.pdf]

## 1. Detailed search strategy.

|    | Keyword                  | Search String                                                                                                           | Search Outcome |
|----|--------------------------|-------------------------------------------------------------------------------------------------------------------------|----------------|
| #1 | HIV                      | HIV[MeSH] OR HIV[tiab]                                                                                                  | 311,083 hits   |
| #2 | PrEP                     | “Pre-Exposure Prophylaxis”[MeSH] OR “pre-exposure prophylaxis”[tiab] OR “preexposure prophylaxis”[tiab] OR “prep”[tiab] | 5,759 hits     |
| #3 | Health services delivery | “Delivery of Health Care”[MeSH] OR “Drug Delivery Systems”[MeSH] OR “health service provision”[tiab]                    | 1,156,295 hits |
|    | #1 AND #2 AND #3         |                                                                                                                         | 828 hits       |
|    |                          | Sorted ‘Best Match’                                                                                                     | 829 hits       |
|    |                          | + Filter ‘Humans’                                                                                                       | 818 hits       |
|    |                          | + Filter ‘English’                                                                                                      | 810 hits       |

Search String adapted to different databases:

| Database         | Search String                                                                                                                                                                                                                                                                   | Additional Filters | Outcome  |
|------------------|---------------------------------------------------------------------------------------------------------------------------------------------------------------------------------------------------------------------------------------------------------------------------------|--------------------|----------|
| MEDLINE (PubMed) | (HIV[MeSH] OR HIV[tiab]) <b>AND</b> (“Pre-Exposure Prophylaxis”[MeSH] OR “pre-exposure prophylaxis”[tiab] OR “preexposure prophylaxis”[tiab] OR “prep”[tiab]) <b>AND</b> (“Delivery of Health Care”[MeSH] OR “Drug Delivery Systems”[MeSH] OR “health service provision”[tiab]) | Human<br>English   | 810 hits |
| WoS              | TS=(“hiv” OR “human immunodeficiency virus”) <b>AND</b> TS=(“prep” OR “pre-                                                                                                                                                                                                     | /                  | 46 hits  |

|                                                                                                                                                                                                        |                                                                                                                                                                                                                             |           |          |
|--------------------------------------------------------------------------------------------------------------------------------------------------------------------------------------------------------|-----------------------------------------------------------------------------------------------------------------------------------------------------------------------------------------------------------------------------|-----------|----------|
|                                                                                                                                                                                                        | exposure prophylaxis"<br>OR "preexposure<br>prophylaxis") <b>AND</b><br>TS=("delivery of care"<br>OR "delivery of<br>services" OR "health<br>services organi*ation"<br>OR "health system*"<br>OR "health*care<br>delivery") |           |          |
| Google Scholar                                                                                                                                                                                         | ("hiv" OR "human<br>immunodeficiency<br>virus") <b>AND</b> ("prep"<br>OR "preexposure<br>prophylaxis" OR "pre-<br>exposure<br>prophylaxis") <b>AND</b><br>("healthcare delivery")                                           | 2012-2019 | 520 hits |
| Title and abstracts extracted to EndNote and monthly e-mail updates set.<br>15 duplicates (PubMed-WoS) were removed (856-15=841).<br>54 duplicates (Scholar-PubMed/WoS) were removed (1 361-54=1 307). |                                                                                                                                                                                                                             |           |          |
