# Supplementary material for: The current landscape of pre-exposure prophylaxis service delivery models for HIV prevention: a scoping review
Source: PubMed Central journal article supplement (PMC7395423; doi:10.1186/s12913-020-05568-w), 2020-07-31
Supplement: 12913_2020_5568_MOESM2_ESM.pdf [file 12913_2020_5568_MOESM2_ESM.pdf]

## 2. Inclusion and exclusion criteria for study selection.

|                           |                     |                                                                                                                                                                                                                                                                                      |
|---------------------------|---------------------|--------------------------------------------------------------------------------------------------------------------------------------------------------------------------------------------------------------------------------------------------------------------------------------|
| <b>Inclusion criteria</b> | Type of articles    | <ul style="list-style-type: none"> <li>- Full-text peer-reviewed research articles (primary and secondary research)</li> <li>- Grey literature (e.g. reports and book chapters)</li> </ul>                                                                                           |
|                           | Language            | <ul style="list-style-type: none"> <li>- English language</li> </ul>                                                                                                                                                                                                                 |
|                           | Geographic context  | <ul style="list-style-type: none"> <li>- Worldwide</li> </ul>                                                                                                                                                                                                                        |
|                           | Timing              | <ul style="list-style-type: none"> <li>- No restrictions</li> </ul>                                                                                                                                                                                                                  |
|                           | PrEP delivery model | <p>PrEP provision in real world setting with mentioning of:</p> <ul style="list-style-type: none"> <li>- Infrastructural setting of PrEP delivery<br/>AND</li> <li>- Target population for PrEP<br/>AND</li> <li>- PrEP provider<br/>AND</li> <li>- Used delivery channel</li> </ul> |

|                           |                                                                                                                                                                                                                                                                                                                                                                                                                                         |
|---------------------------|-----------------------------------------------------------------------------------------------------------------------------------------------------------------------------------------------------------------------------------------------------------------------------------------------------------------------------------------------------------------------------------------------------------------------------------------|
| <b>Exclusion criteria</b> | <ul style="list-style-type: none"> <li>- Non-oral administration methods of PrEP</li> <li>- Articles focusing on steps in the PrEP care continuum not related to PrEP provision (e.g. creating awareness and assessing eligibility)</li> <li>- Non-research articles not discussing PrEP service delivery as its main focus.</li> <li>- Demonstration projects not studying PrEP service delivery aspects as its main focus.</li> </ul> |
|---------------------------|-----------------------------------------------------------------------------------------------------------------------------------------------------------------------------------------------------------------------------------------------------------------------------------------------------------------------------------------------------------------------------------------------------------------------------------------|
