# Supplementary material for: The current landscape of pre-exposure prophylaxis service delivery models for HIV prevention: a scoping review
Source: PubMed Central journal article supplement (PMC7395423; doi:10.1186/s12913-020-05568-w), 2020-07-31
Supplement: 12913_2020_5568_MOESM3_ESM.pdf [file 12913_2020_5568_MOESM3_ESM.pdf]

### 3. Measurement and interpretation of the Kappa coefficient.

**Table 1.** Degree of Agreement Between Two Reviewers.

|                   | Reviewer 2 reject | Reviewer 2 accept | TOTAL |
|-------------------|-------------------|-------------------|-------|
| Reviewer 1 reject | 73                | 0                 | 73    |
| Reviewer 1 accept | 8                 | 8                 | 16    |
|                   | 81                | 8                 | 89    |

**Table 2.** Measurement of Kappa coefficient.

| (PO) Observed Agreement | (PE) Expected Agreement | K     |
|-------------------------|-------------------------|-------|
| 0,910                   | 0,762                   | 0,621 |

**Table 3.** Interpretation of Kappa coefficient.

| Interpretation |                       |
|----------------|-----------------------|
| Value of K     | Strength of agreement |
| < 0.20         | Poor                  |
| 0.21-0.40      | Fair                  |
| 0.41-0.60      | Moderate              |
| 0.61-0.80      | Good                  |
| 0.81-1.00      | Very good             |
