# Supplementary material for: The current landscape of pre-exposure prophylaxis service delivery models for HIV prevention: a scoping review
Source: PubMed Central journal article supplement (PMC7395423; doi:10.1186/s12913-020-05568-w), 2020-07-31
Supplement: 12913_2020_5568_MOESM4_ESM.pdf [file 12913_2020_5568_MOESM4_ESM.pdf]

#### 4. Data extraction sheet.

|                                                          |
|----------------------------------------------------------|
| Author                                                   |
| Date                                                     |
| Country, region and/or city where research was conducted |
| Research tradition (QUAL, QUAN, Mixed Methods)           |
| Study type                                               |
| Research purpose                                         |
| Time frame in which research was conducted               |
| Target population for PrEP                               |
| Health care setting in which PrEP was provided           |
| PrEP provider characteristics                            |
| Delivery channels used for PrEP                          |
| Main findings                                            |
