# Supplementary material for: The current landscape of pre-exposure prophylaxis service delivery models for HIV prevention: a scoping review
Source: PubMed Central journal article supplement (PMC7395423; doi:10.1186/s12913-020-05568-w), 2020-07-31
Supplement: 12913_2020_5568_MOESM6_ESM.pdf [file 12913_2020_5568_MOESM6_ESM.pdf]

## 6. Overview of the evolution of the literature.

| Year | Number of articles | Geographic focus                                                                      | Description of the literature                                                                                                                                                                                           |
|------|--------------------|---------------------------------------------------------------------------------------|-------------------------------------------------------------------------------------------------------------------------------------------------------------------------------------------------------------------------|
| 2014 | 1                  | USA                                                                                   | Descriptive report (n=1)                                                                                                                                                                                                |
| 2015 | 1                  | USA                                                                                   | Descriptive report (n=1)                                                                                                                                                                                                |
| 2016 | 2                  | USA, South Africa                                                                     | Review (n=1) and national guidelines on PrEP (n=1)                                                                                                                                                                      |
| 2017 | 4                  | USA, South Africa, Kenya, Zimbabwe                                                    | Descriptive report (n=1), pilot study (n=1), a national PrEP implementation framework (n=1) and a national PrEP implementation plan (n=1)                                                                               |
| 2018 | 13                 | USA, Canada, Peru, Thailand, South Africa, Belgium, UK, New Zealand, Kenya, Australia | Descriptive report (n=7), pilot study (n=3), protocol for a pilot study (n=1), viewpoint (n=1) and a case study (n=1)                                                                                                   |
| 2019 | 12                 | USA, Canada, Kenya, UK, The Netherlands, France                                       | Descriptive report (n=2), pilot study (n=4), qualitative adherence evaluation study (n=1), protocol for a RCT (n=1), national PrEP implementation report (n=1), quantitative survey (n=1), RCT (n=1) and a review (n=1) |
